# Supplementary material for: Exploring skeletal disorders in cattle and sheep: a WGS-based framework for diagnosis and classification
Source: Genet Sel Evol. 2025 Sep 25;57:51. doi: 10.1186/s12711-025-01002-z (PMC12465177; doi:10.1186/s12711-025-01002-z)
Supplement: Supplementary file 2 — Additional file 2: Table S1. Cases phenotypical information, congenital skeletal disorders classification, associated genes, mode of inheritance and variants characterization. [file 12711_2025_1002_MOESM2_ESM.xlsx]

## Sheet: Cases
Supplementary Table S1. Cases phenotypical information, congenital skeletal disorders classification, associated genes, mode of inheritance and variants characterization
																										WGS approach				Variant pathogenicity classification***
Case_ID_in_manuscript	Sex	Specie	Breed	VBO Identifier *	Phenotype	Phenotype classification**	EBI Project ID	EBI Sample ID	Candidate variant?	Chromosomal abnormality	Gene	MOI	#CHROM	NCBI ID (g.)	POS	REF	ALT	EFFECT	IMPACT	BIOTYPE	FEATURE	NCBI transcript ID	HGVS_C	NCBI protein Id	HGVS_P	Trio	Paternal halfsib	Single case	>1 case with same phenotype	Detected criteria	Variant classification	Cases submitted to:	Country
1	f	Bos taurus	Holstein Friesian	VBO:0000239	Achondrogenesis, type II	Type 2 collagen disorders	PRJEB18113	SAMEA114347174	yes		COL2A1	AD	5	NC_037332.1	32312706	CGGTGTGGACATA	C	12bp_del	HIGH	protein_coding	transcript	NM_001001135.3	c.4432_4443del	NP_001001135.2	p.Gly1478_Ile1481del	yes	no	no	no	PS2, PS4, PM1, PP1	Pathogenic	University of Bologna	Italy
2	m	Ovis aries	Charollais x Suffolk	VBO:0001368 x VBO:0001627	Achondrogenesis, type II	Type 2 collagen disorders	PRJEB30931	SAMEA111532045	yes		COL2A1	AD	3	NC_056056.1	138610131	G	A	missense_variant	MODERATE	protein_coding	transcript	XM_042246797.1	c.2908G>A	XP_042102731.1	p.Gly970Ser	no	yes	no	yes	PS2, PS4, PS5, PM1, PP1, PP3	Pathogenic	Animal and Plant Health Agency (APHA); Sheep & Beef Health Services	UK
3	f	Ovis aries	Charollais x NC Mule	VBO:0001368 x (VBO:0017369 x VBO:0001344)	Achondrogenesis, type II	Type 2 collagen disorders	PRJEB30931	SAMEA111532046	yes		COL2A1	AD	3	NC_056056.1	138610131	G	A	missense_variant	MODERATE	protein_coding	transcript	XM_042246797.1	c.2908G>A	XP_042102731.1	p.Gly970Ser	no	yes	no	yes	PS2, PS5, PS4, PM1, PP1, PP3	Pathogenic	Animal and Plant Health Agency (APHA); Sheep & Beef Health Services	UK
4	f	Ovis aries	Charollais x Suffolk	VBO:0001368 x VBO:0001627	Achondrogenesis, type II	Type 2 collagen disorders	NA	NA	yes		COL2A1	AD	3	NC_056056.1	138610131	G	A	missense_variant	MODERATE	protein_coding	transcript	XM_042246797.1	c.2908G>A	XP_042102731.1	p.Gly970Ser					PS2, PS5, PS4, PM1, PP1, PP3	Pathogenic	Animal and Plant Health Agency (APHA); Sheep & Beef Health Services	UK
5	m	Ovis aries	Charollais x Suffolk	VBO:0001368 x VBO:0001627	Achondrogenesis, type II	Type 2 collagen disorders	NA	NA	yes		COL2A1	AD	3	NC_056056.1	138610131	G	A	missense_variant	MODERATE	protein_coding	transcript	XM_042246797.1	c.2908G>A	XP_042102731.1	p.Gly970Ser					PS2, PS5, PS4, PM1, PP1, PP3	Pathogenic	Animal and Plant Health Agency (APHA); Sheep & Beef Health Services	UK
6	f	Ovis aries	Charollais x Suffolk	VBO:0001368 x VBO:0001627	Achondrogenesis, type II	Type 2 collagen disorders	NA	NA	yes		COL2A1	AD	3	NC_056056.1	138610131	G	A	missense_variant	MODERATE	protein_coding	transcript	XM_042246797.1	c.2908G>A	XP_042102731.1	p.Gly970Ser					PS2, PS5, PS4, PM1, PP1, PP3	Pathogenic	Animal and Plant Health Agency (APHA); Sheep & Beef Health Services	UK
7	f	Ovis aries	Charollais x Suffolk	VBO:0001368 x VBO:0001627	Achondrogenesis, type II	Type 2 collagen disorders	NA	NA	yes		COL2A1	AD	3	NC_056056.1	138610131	G	A	missense_variant	MODERATE	protein_coding	transcript	XM_042246797.1	c.2908G>A	XP_042102731.1	p.Gly970Ser					PS2, PS5, PS4, PM1, PP1, PP3	Pathogenic	Animal and Plant Health Agency (APHA); Sheep & Beef Health Services	UK
8	f	Bos taurus	Holstein Friesian	VBO:0000239	Osteogenesis imperfecta	Osteogenesis imperfecta and bone fragility group	PRJEB18113	SAMEA111531485	yes		PPIB	AR	10	NC_037337.1	45822912	G	C	intron_variant	MODIFIER	protein_coding	transcript	NM_174152.2	c.320-443G>C	NP_776577.1		yes	no	no	no	PS4, BP4	Uncertain significance	University of Copenhagen	Denmark
9	m	Bos taurus	Stabiliser	VBO:0004811	Osteogenesis imperfecta	Osteogenesis imperfecta and bone fragility group	PRJEB18113	SAMEA111531503	yes		COL1A2	AD	4	NC_037331.1	11792118	G	A	missense_variant	MODERATE	protein_coding	transcript	NM_174520.2	c.1156G>A	NP_776945.1	p.Gly386Arg	yes	no	no	yes	PS4, PS5, PM1, PP1, PP3	Pathogenic	Animal and Plant Health Agency (APHA)	UK
10	f	Bos taurus	Stabiliser	VBO:0004811	Osteogenesis imperfecta	Osteogenesis imperfecta and bone fragility group	PRJEB18113	SAMEA111531505	yes		COL1A2	AD	4	NC_037331.1	11792118	G	A	missense_variant	MODERATE	protein_coding	transcript	NM_174520.2	c.1156G>A	NP_776945.1	p.Gly386Arg	yes	no	no	yes	PS4, PS5, PM1, PP1, PP3	Pathogenic	Animal and Plant Health Agency (APHA)	UK
11	f	Ovis aries	Charollais x (Lleyn x Romney)	VBO:0001368 x (VBO:0001491 x VBO:0001581)	Osteogenesis imperfecta	Osteogenesis imperfecta and bone fragility group	PRJEB30931	SAMEA112775188	yes		COL1A1	AD	11	NC_056064.1	36197409	G	A	missense_variant	MODERATE	protein_coding	transcript	XM_027974705.2	c.1189G>A	XP_027830506.1	p.Gly397Ser	no	yes	no	yes	PS2, PS4, PS5, PM1, PP1, PP3	Pathogenic	Animal and Plant Health Agency (APHA)	UK
12	f	Ovis aries	Charollais x (Lleyn x Romney)	VBO:0001368 x (VBO:0001491 x VBO:0001581)	Osteogenesis imperfecta	Osteogenesis imperfecta and bone fragility group	PRJEB30931	SAMEA112775189	yes		COL1A1	AD	11	NC_056064.1	36197409	G	A	missense_variant	MODERATE	protein_coding	transcript	XM_027974705.2	c.1189G>A	XP_027830506.1	p.Gly397Ser	no	yes	no	yes	PS2, PS4, PS5, PM1, PP1, PP3	Pathogenic	Animal and Plant Health Agency (APHA)	UK
13	m	Ovis aries	Charollais x (Lleyn x Romney)	VBO:0001368 x (VBO:0001491 x VBO:0001581)	Osteogenesis imperfecta	Osteogenesis imperfecta and bone fragility group	PRJEB30931	SAMEA112775190	yes		COL1A1	AD	11	NC_056064.1	36197409	G	A	missense_variant	MODERATE	protein_coding	transcript	XM_027974705.2	c.1189G>A	XP_027830506.1	p.Gly397Ser	no	yes	no	yes	PS2, PS4, PS5, PM1, PP1, PP3	Pathogenic	Animal and Plant Health Agency (APHA)	UK
14	f	Bos taurus	Angus x Holstein Friesian	VBO:0000090 x VBO:0000239	Osteopetrosis and brachignatia inferior	Osteopetrosis and related osteoclast disorders	PRJEB18113	SAMEA111531473	yes		LOC112445140	Dominant X-linked	X	NC_037357.1	10872688	G	T	stop_gained	HIGH	protein_coding	transcript	XM_024988726.1	c.332C>A	XP_024844494.1	p.Ser111*	yes	no	no	no	PS2, PS4	Pathogenic	University of Bern	Switzerland
15	f	Bos taurus	Holstein Friesian	VBO:0000239	Caudal and thoracic vertebral and viscerocranial malformations	Sulfation disorders	PRJEB18113	SAMEA111531471	yes		SLC40A1	AD	2	NC_037329.1	6785954	T	A	missense_variant	MODERATE	protein_coding	transcript	NM_001077970.1	c.323T>A	NP_001071438.1	p.Ile108Asn	yes	no	no	no	PS2, PS4, PM1, PP1, PP3	Pathogenic	University of Bern	Switzerland
16	m	Bos taurus	Simmental	VBO:0000380	Primordial proportionate dwarfism	Primordial dwarfism and slender bones group	PRJEB18113	SAMEA33669418	no																	yes	no	no	no			University of Ljubljana	Slovenia
17	f	Bos taurus	Simmental	VBO:0000380	Primordial proportionate dwarfism	Primordial dwarfism and slender bones group	PRJEB18113	SAMEA19877668	yes		PTPN9	AD	21	NC_037348.1	33356490	G	A	missense_variant	MODERATE	protein_coding	transcript	NM_001192054.2	c.826G>A	NP_001178983.1	p.Ala276Thr	no	no	yes	no	PS4	Uncertain significance	University of Bologna	Italy
18	m	Bos taurus	Angus	VBO:0000090	Primordial dwarfism	Primordial dwarfism and slender bones group	PRJEB18113	SAMEA12596613	yes		PRDM10	AD	29	NC_037356.1	36138136	G	A	missense_variant	MODERATE	protein_coding	transcript	NM_001191168.1	c.866C>T	NP_001178097.1	p.Pro289Leu	no	yes	no	yes	PS4, PS5, PM1, PP1, PP3, PP4	Pathogenic	Farm Post Mortems LDA; SRUC Veterinary and Analytical Services	UK
19	f	Bos taurus	Angus	VBO:0000090	Primordial dwarfism	Primordial dwarfism and slender bones group	PRJEB18113	SAMEA12596614	yes		PRDM10	AD	29	NC_037356.1	36138136	G	A	missense_variant	MODERATE	protein_coding	transcript	NM_001191168.1	c.866C>T	NP_001178097.1	p.Pro289Leu	no	yes	no	yes	PS4, PS5, PM1, PP1, PP3, PP4	Pathogenic	Farm Post Mortems LDA; SRUC Veterinary and Analytical Services	UK
20	m	Bos taurus	Holstein Friesian	VBO:0000239	Primordial disproportionate dwarfism	Primordial dwarfism and slender bones group	PRJEB18113	SAMEA112689402	no																	no	no	yes	no			Justus Liebig University Giessen	Germany
21	m	Bos taurus	Holstein Friesian	VBO:0000239	Primordial disproportionate dwarfism with craniofacial dysmorphism	Primordial dwarfism and slender bones group	PRJEB18113	SAMEA112689403	yes		PDGFRA	AD	6	NC_037333.1	69749162	T	C	missense_variant	MODERATE	protein_coding	transcript	NM_001192345.2	c.1685T>C	NP_001179274.1	p.Ile562Thr	no	no	yes	no	PS4, PM1, PP1, PP3	Pathogenic	Justus Liebig University Giessen	Germany
22	f	Bos taurus	Limousin x Brown Swiss	VBO:0000274 x VBO:0000166	Primordial proportionate dwarfism	Primordial dwarfism and slender bones group	PRJEB18113	SAMEA32992918	yes		ABCC8	AD	15	NC_037342.1	35095352	A	G	missense_variant	MODERATE	protein_coding	transcript	NM_001205610.2	c.2875A>G	NP_001192539.1	p.Met959Val	no	no	yes	no	PS4, PP1, PP3	Likely pathogenic	University of Bern	Switzerland
23	f	Bos taurus	Holstein Friesian	VBO:0000239	Arachnomelia	Primordial dwarfism and slender bones group	PRJEB18113	SAMEA19865668	no																	yes	no	no	no			University of Bologna	Italy
24	m	Bos taurus	Angus	VBO:0000090	Craniofacial dysmorphism-hydrocephalus-dwarfism syndrome	Primordial dwarfism and slender bones group	PRJEB18113	SAMEA115112619	yes	Trisomy 23		AD														yes	no	no	no		Pathogenic	University of Bern	Switzerland
25	m	Bos taurus	Inra 95 x Holstein Friesian	VBO:0000245 x VBO:0000239	Polydactyly	Polydactyly-Syndactyly-Triphalangism group	PRJEB18113	SAMEA114347187	yes	Partial monosomy chr28		AD														yes	no	no	no		Pathogenic	Veterinary Practice Zettlitz; Saxon State Laboratory for Health and Veterinary Affairs, Leipzig	Germany
26	f	Bos taurus	Holstein Friesian	VBO:0000239	Syndactyly	Polydactyly-Syndactyly-Triphalangism group	PRJEB18113	SAMEA7690211	yes		LRP4	AR, compound heterozygous	15	NC_037342.1	V1.76800972; V2.76819481	V1.C; V2.G	V1.AT; V2.A	missense_variant	V1.HIGH; V2.MODERATE	protein_coding	transcript	NM_001077843.1	V1.c.4863_4864delinsAT; V2.c.4940C>T	NP_001071311.1	V1.p.Asn1621_Gly1622delinsLysCys; V2.p.Pro1647Leu	yes	no	no	yes	PVS1, PS3, PS4, PM1, PP1, PP3	Pathogenic	University of Bern	Switzerland
27	m	Bos taurus	Holstein Friesian	VBO:0000239	Syndactyly	Polydactyly-Syndactyly-Triphalangism group	PRJEB18113	SAMEA10833820	yes		LRP4	AR, compound heterozygous	15	NC_037342.1	V1.76800972; V2.76800896	V1.C; V2.G	V1.A; V2.A	missense_variant	V1.HIGH; V2.MODERATE	protein_coding	transcript	NM_001077843.1	V1.c.4863_4864delinsAT; V2c.1480C>T	NP_001071311.1	V1.p.Asn1621_Gly1622delinsLysCys; V2.p.Arg494Cys	no	no	no	yes	PVS1, PS3, PS4, PM1, PP1, PP3	Pathogenic	University of Bern	Switzerland
28	f	Bos taurus	Holstein Friesian	VBO:0000239	Syndactyly	Polydactyly-Syndactyly-Triphalangism group	PRJEB18113	SAMEA10833821	yes		KMT2C	AR	4	NC_037331.1	114640130	G	T	missense_variant	MODERATE	protein_coding	transcript	XM_024991265.1	c.6031C>A	XP_024847033.1	p.Pro2011Thr	no	no	yes	no	PS4	Uncertain significance	University of Bern	Switzerland
29	m	Bos taurus	Droughtmaster	VBO:0000196	Syndactyly	Polydactyly-Syndactyly-Triphalangism group	PRJEB18113	SAMEA10833861	yes		CD4	AR	5	NC_037332.1	103647362	G	A	missense_variant	MODERATE	protein_coding	transcript	NM_001103225.1	c.59C>T	NP_001096695.1	p.Pro20Leu	no	no	yes	no	PP3, BS1, BS2	Uncertain significance	Elizabeth Macarthur Agricultural Institute, NSW Department of Primary Industries and Regional Development; The University of Sydney	Australia
30	f	Bos taurus	Angus	VBO:0000090	Congenital rickets	Disorders of bone mineralisation	PRJEB18113	SAMEA12596609	no																	no	yes	no	yes			SRUC Veterinary and Analytical Services	UK
31	f	Bos taurus	Angus	VBO:0000090	Congenital rickets	Disorders of bone mineralisation	PRJEB18113	SAMEA12596610	no																	no	yes	no	yes			SRUC Veterinary and Analytical Services	UK
32	m	Bos taurus	Holstein Friesian	VBO:0000239	Craniofacial dysmorphisms and forelimbs skeletal dysplasia	Dysplasias with multiple joint dislocations	PRJEB18113	SAMEA111531488	yes		CCT3	AD	3	NC_037330.1	14497551	T	C	missense_variant	MODERATE	protein_coding	transcript	NM_001017934.3	c.907T>C	NP_001017934.2	p.Tyr303His	no	no	yes	no	PS4, PP1, PP3	Likely pathogenic	University of Copenhagen	Denmark
33	m	Bos taurus	Holstein Friesian	VBO:0000239	Craniofacial dysmorphisms, forelimbs dislocations, and skeletal dysplasia	Dysplasias with multiple joint dislocations	PRJEB18113	SAMEA112689404	yes		ITGAE	AR	19	NC_037346.1	24423519	A	G	missense_variant	MODERATE	protein_coding	transcript	XM_002695790.6	c.986T>C	XP_002695836.2	p.Ile329Thr	no	no	yes	no	PS4, PP1, PP3	Likely pathogenic	Justus Liebig University Giessen	Germany
34	f	Bos taurus	Chianina	VBO:0000178	Craniofacial dismorphism and forelimbs dysplasia with joint contracture	Dysplasias with multiple joint dislocations	PRJEB18113	SAMEA8565050	yes		CNTNAP1	AR, compound heterozygous	19	NC_037346.1	V1.42747176; V2.42748559	V1.G; V2.G	V1.A; V2.A	V1.missense_variant; V2.intron_variant	V1.MODERATE; V2.MODIFIER	protein_coding	transcript	NM_001206895.1	V1.c.1495G>A; V2.c.2531-52G>A	NP_001193824.1	V1.p.Ala734Thr	no	no	yes	no	PS4, PP1, PP3	Likely pathogenic	University of Bologna	Italy
35	f	Bos taurus	Holstein Friesian	VBO:0000239	Forelimbs dysplasia with joint contracture	Dysplasias with multiple joint dislocations	PRJEB18113	SAMEA112689401	yes		NFE2L1	AD	19	NC_037346.1	38426902	AAGG	A	disruptive_inframe_deletion	HIGH	protein_coding	transcript	XM_005220590.4	c.531_533delCCT	XP_005220647.1	p.Leu178del	no	no	yes	no	PS4, PP1, PP3	Likely pathogenic	Justus Liebig University Giessen	Germany
36	f	Bos taurus	Chianina	VBO:0000178	Forelimbs dysplasia with joint contracture	Dysplasias with multiple joint dislocations	PRJEB18113	SAMEA8565051	yes		IL16	AD	21	NC_037348.1	27078178	A	G	missense_variant	MODERATE	protein_coding	transcript	XM_024981655.1	c.1624A>G	XP_024837423.1	p.Asn542Asp	no	no	yes	no	PS4, PP1, PP3	Likely pathogenic	University of Bologna	Italy
37	m	Bos taurus	Limousin	VBO:0000274	Forelimbs dysplasia with joint contracture	Dysplasias with multiple joint dislocations	PRJEB18113	SAMEA111531466	no																	yes	no	no	yes			University of Bern	Switzerland
38	m	Bos taurus	Limousin	VBO:0000274	Forelimbs dysplasia with joint contracture	Dysplasias with multiple joint dislocations	PRJEB18113	SAMEA111531468	no																	yes	no	no	yes			University of Bern	Switzerland
39	m	Bos taurus	Rendena	VBO:0016993	Hemifacial microsomia with hemivertebrae	Vertebral and costal dysostoses	PRJEB18113	SAMEA10833856	no																	yes	no	no	no			University of Bologna	Italy
* Vertebrate Breed Ontology identifier: https://www.ebi.ac.uk/ols4/ontologies/vbo
** Adapted from Unger S, Ferreira CR, Mortier GR, Ali H, Bertola DR, Calder A, et al. Nosology of genetic skeletal disorders: 2023 revision. Am J Med Genet A 2023;191:1164–209.
*** Based on Boeykens F, Abitbol M, Anderson H, Casselman I, de Citres CD, Hayward JJ, et al. Development and validation of animal variant classification guidelines to objectively evaluate genetic variant pathogenicity in domestic animals. Front Vet Sci 2024;11.
NA= not available, WGS was not performed for these cases, PCR and Sanger sequencing genotyping was performed in the cases and parents
V1=variant 1
V2=variant 2
AR=autosomal recessive
AD=autosomal dominant
