# Supplementary material for: Exploring skeletal disorders in cattle and sheep: a WGS-based framework for diagnosis and classification
Source: Genet Sel Evol. 2025 Sep 25;57:51. doi: 10.1186/s12711-025-01002-z (PMC12465177; doi:10.1186/s12711-025-01002-z)
Supplement: Supplementary file 3 — Additional file 3: Table S2. Annotated genes encompassed in the chromosome 28 partial monosomy in the crossbred calf with polydactyly (case 25). [file 12711_2025_1002_MOESM3_ESM.xlsx]

## Sheet: NCBI RefSeq Annotation GCF_0022
Supplementary Table S2. Annotated genes encompassed in the chromosome 28 partial monosomy in the crossbred calf with polydactyly (case 25).
NCBI ID (g.)	Start (g.)	End (g.)	Gene
NC_037355.1	40404329	41089777	GRID1
NC_037355.1	41000072	41000167	MIR346
NC_037355.1	41160833	41238268	WAPL
NC_037355.1	41168771	41168861	LOC112444795
NC_037355.1	41205913	41206020	LOC112444780
NC_037355.1	41218619	41218722	LOC112444790
NC_037355.1	41312626	41322731	OPN4
NC_037355.1	41325439	41384908	LDB3
NC_037355.1	41403869	41545706	BMPR1A
NC_037355.1	41554482	41569881	MMRN2
NC_037355.1	41570936	41575651	SNCG
NC_037355.1	41580847	41583092	ADIRF
NC_037355.1	41583182	41593326	FAM25A
NC_037355.1	41605250	41626135	LOC112444758
NC_037355.1	41609011	41649016	GLUD1
NC_037355.1	41649000	41763725	SHLD2
NC_037355.1	41775875	41786740	SYT15B
NC_037355.1	41800504	41807663	GPRIN2
NC_037355.1	41871295	41875541	LOC112444744
NC_037355.1	41909739	41917205	PPYR1
NC_037355.1	41953895	41970228	ANXA8L1
NC_037355.1	41982450	42026736	ANTXRL
NC_037355.1	42032328	42074337	LOC112444747
NC_037355.1	42074734	42116709	LOC112444750
NC_037355.1	42080881	42081537	LOC112444720
NC_037355.1	42136743	42176132	LOC132344150
NC_037355.1	42194348	42219396	LOC112444752
NC_037355.1	42228392	42238088	ZNF488
NC_037355.1	42245561	42255103	RBP3
NC_037355.1	42263199	42267306	GDF2
NC_037355.1	42267779	42270641	LOC132344151
NC_037355.1	42278917	42291525	GDF10
NC_037355.1	42452093	42576716	PTPN20
NC_037355.1	42473316	42478885	LOC132344152
NC_037355.1	42579886	42688363	FRMPD2
NC_037355.1	42712810	42813456	MAPK8
NC_037355.1	42821080	43000622	ARHGAP22
NC_037355.1	43020260	43268439	WDFY4
NC_037355.1	43048925	43063177	LOC132344153
